# Supplementary material for: Structure-modulated CaFe-LDHs with superior simultaneous removal of deleterious anions and corrosion protection of steel rebar
Source: Royal Society of Chemistry journal article supplement (doi:10.1039/d1ra00300c), 2021-01-01

## Electronic Supplementary Information (ESI)

### Structure-modulated CaFe-LDHs with superior simultaneous removal of deleterious anions and corrosion protection of steel rebar

Ji Young Park<sup>a</sup>, Jimin Lee<sup>a</sup>, Minseob Lim<sup>a</sup>, Gwang-Myeong Go<sup>a</sup>, Hong-Baek Cho<sup>a</sup>, Han-Seung Lee<sup>b</sup> and Yong-Ho Choa<sup>a,†</sup>

Yong-ho Choa, Professor  
Dept. of Materials Science and Chemical Engineering  
Hanyang University-ERICA Campus  
Ansan, Gyeonggi-do, 15588, Korea  
TEL; +82-31-400-5650  
E-mail; [choa15@hanyang.ac.kr](mailto:choa15@hanyang.ac.kr)

Ji Young Park, Doctoral Student  
Dept. of Materials Science and Chemical Engineering  
Hanyang University-ERICA Campus  
Ansan, Gyeonggi-do, 15588, Korea  
TEL; +82-31-400-4714  
E-mail; [pjiyoung74@gmail.com](mailto:pjiyoung74@gmail.com)

Jimin Lee, Doctoral Student  
Dept. of Materials Science and Chemical Engineering  
Hanyang University-ERICA Campus  
Ansan, Gyeonggi-do, 15588, Korea  
TEL; +82-31-400-4714  
E-mail; [ezmin1992@gmail.com](mailto:ezmin1992@gmail.com)

Minseob Lim, Doctoral Student  
Dept. of Materials Science and Chemical Engineering  
Hanyang University-ERICA Campus  
Ansan, Gyeonggi-do, 15588, Korea  
TEL; +82-31-400-4714  
E-mail; [torant@naver.com](mailto:torant@naver.com)

Gwang-Myeong Go, Doctoral Student  
Dept. of Materials Science and Chemical Engineering  
Hanyang University-ERICA Campus  
Ansan, Gyeonggi-do, 15588, Korea  
TEL; +82-31-400-4714  
E-mail; [rhkdaudww@gmail.com](mailto:rhkdaudww@gmail.com)

Hong-Baek Cho, Ph.D  
Dept. of Materials Science and Chemical Engineering  
Hanyang University-ERICA Campus  
Ansan, Gyeonggi-do, 15588, Korea  
TEL; +82-31-400-4714  
E-mail; [hongbaek27@gmail.com](mailto:hongbaek27@gmail.com)

Han-Seung Lee, Ph.D  
Dept. of Architectural Engineering  
Hanyang University-ERICA Campus  
Ansan, Gyeonggi-do, 15588, Korea  
TEL; +82-31-436-8160  
E-mail; [ercleehs@hanyang.ac.kr](mailto:ercleehs@hanyang.ac.kr)

### Supporting Figure captions

SI. 1. FTIR spectrum of CaFe-LDHs showing different structure transformation according to thermal treatment conditions: (a) view of overall range and magnified views in the ranges of (b) 1200-1700  $\text{cm}^{-1}$ , (c) 2500-3900  $\text{cm}^{-1}$ , and (d) 500-1000  $\text{cm}^{-1}$ .

SI 2. FTIR spectra of CaFe-LDHs with (a) pristine LDHs, (b) C-400 LDHs, and (c) C-700 LDHs after  $\text{Cl}^-$ ,  $\text{SO}_4^{2-}$ , and  $\text{CO}_3^{2-}$  anion adsorption.

SI 3. XRD pattern of CaFe-LDHs with (a) pristine LDHs (b) C-400 LDHs, and (c) C-700 LDHs after  $\text{Cl}^-$ ,  $\text{SO}_4^{2-}$ , and  $\text{CO}_3^{2-}$  anion adsorption.

## List of SI

SI. 1.

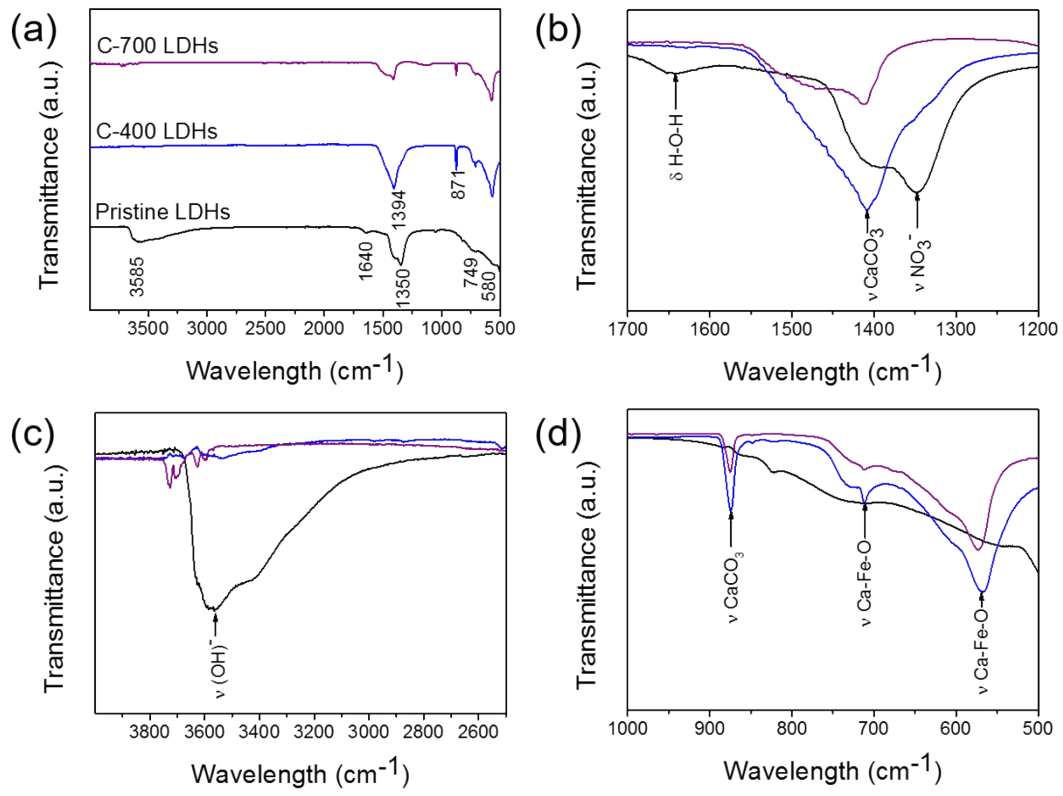

Sl. 2.

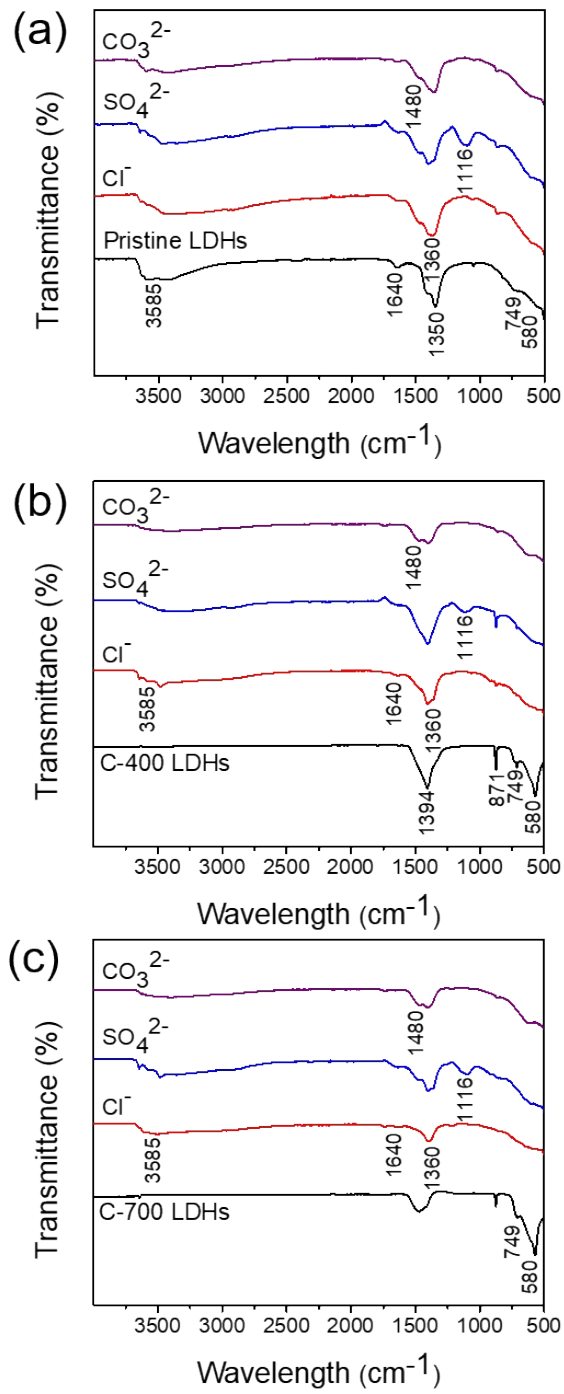

SI. 3.

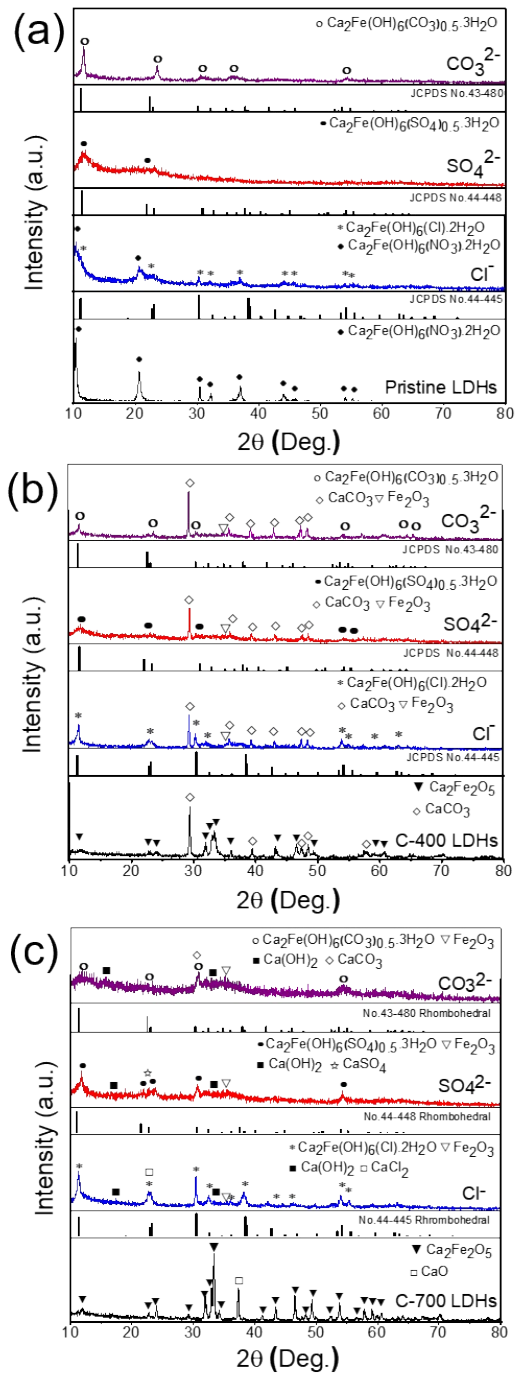

Supplement: d1ra00300c1.pdf [file d1ra00300c1.pdf]
